## RESEARCH REPORT

# Morphogenesis is transcriptionally coupled to neurogenesis during peripheral olfactory organ development

Raphaël Aguillon<sup>1</sup>, Romain Madelaine<sup>1</sup>, Marion Aguirrebengoa<sup>2</sup>, Harendra Guturu<sup>3</sup>, Sandra Link<sup>4,\*</sup>, Pascale Dufourcq<sup>1</sup>, Virginie Lecaudey<sup>4,‡</sup>, Gill Bejerano<sup>5</sup>, Patrick Blader<sup>1,§</sup> and Julie Batut<sup>1,§</sup>

## ABSTRACT

Sense organs acquire their distinctive shapes concomitantly with the differentiation of sensory cells and neurons necessary for their function. Although our understanding of the mechanisms controlling morphogenesis and neurogenesis in these structures has grown, how these processes are coordinated remains largely unexplored. Neurogenesis in the zebrafish olfactory epithelium requires the bHLH proneural transcription factor Neurogenin 1 (Neurog1). To address whether Neurog1 also controls morphogenesis, we analysed the migratory behaviour of early olfactory neural progenitors in *neurog1* mutant embryos. Our results indicate that the oriented movements of these progenitors are disrupted in this context. Morphogenesis is similarly affected by mutations in the chemokine receptor gene, *cxcr4b*, suggesting it is a potential Neurog1 target gene. We find that Neurog1 directly regulates *cxcr4b* through an E-box cluster located just upstream of the *cxcr4b* transcription start site. Our results suggest that proneural transcription factors, such as Neurog1, directly couple distinct aspects of nervous system development.

**KEY WORDS:** Neurogenin 1, Chemokine, Morphogenesis, Neurogenesis, Olfactory placode, Zebrafish

## INTRODUCTION

The morphology of sense organs of the head is exquisitely adapted for detecting specific stimuli. At the same time that morphogenetic movements sculpt these structures during development, cell types are specified that will participate in their function either by detecting specific stimuli or transmitting sensory information to the brain. There is a growing literature concerning the molecular mechanisms controlling morphogenesis and specification of different cell types

in sensory organs. Whether morphogenesis and cell fate specification are linked molecularly during the development of these organs, on the other hand, is unclear.

The zebrafish olfactory epithelium develops from a horseshoe-shaped pool of neural progenitors located at the boundary between the anterior neural plate and flanking non-neural ectoderm (Miyasaka et al., 2013). Neurogenesis in this system occurs in two distinct waves (Madelaine et al., 2011). Between 10 and 24 h post-fertilisation (hpf), a set of early-born olfactory neurons (EON) differentiates. These neurons act as pioneers during the establishment of projections of olfactory sensory neurons (OSN) to the olfactory bulb, which are born during the second wave. Once OSN projections are established, a subset of EON dies by apoptosis (Whitlock and Westerfield, 1998). The development of both EON and OSN require the partially redundant function of the basic helix-loop-helix (bHLH) proneural transcription factors Neurog1 and Neurod4 (Madelaine et al., 2011).

Concomitant with the earliest wave of neurogenesis in the developing olfactory epithelium, morphogenetic movements shape olfactory progenitors and newly born EON into a placode (12–18 hpf) and then a rudimentary cup (18–24 hpf) (Whitlock and Westerfield, 2000; Miyasaka et al., 2007; Breau et al., 2017). This process requires the chemokine receptor *Cxcr4b*, and its ligand *Cxcl12a*. Interfering with the activity of this signalling pathway, either by mis-expression of *Cxcl12a* or in *odysseus* (*ody*) embryos that carry mutations in *cxcr4b*, affects olfactory placode morphogenesis (Miyasaka et al., 2007).

In parallel to its role in olfactory neurogenesis, Neurog1 is ideally placed to control the cell movements that underlie morphogenesis of the olfactory cup, thus coupling morphogenesis and neurogenesis. Consistent with this idea, we find that the early phase of morphogenesis is compromised in *neurog1* mutant embryos. We provide evidence that the underlying defect is a lack of *cxcr4b* expression, which is directly regulated by Neurog1. Thus, we have uncovered a parsimonious mechanism for coordinating multiple features of peripheral sensory organ development.

## RESULTS AND DISCUSSION

To address a potential role for Neurog1 in the morphogenesis of the peripheral olfactory organ, we analysed its formation by time-lapse imaging *neurog1* mutant or control embryos carrying a *Tg(-8.Neurog1:gfp)* transgene (Golling et al., 2002; Blader et al., 2003); this transgene recapitulates the expression of endogenous *neurog1* during the development of the olfactory epithelium and has already been used as a short-term lineage label for the progenitors of EON (Madelaine et al., 2011; Breau et al., 2017). As recently described by Breau and colleagues, we found that EON reach their final position in control embryos by converging towards a point close to the centre of the future cup (as represented in Fig. 1A; Breau et al., 2017). Considering overall antero-posterior (AP) length of the EON

<sup>1</sup>Centre de Biologie du Développement (CBD, UMR5547), Centre de Biologie Intégrative (CBI, FR 3743), Université de Toulouse, CNRS, UPS, 31062, France.

<sup>2</sup>BigA Core Facility, Centre de Biologie Intégrative (CBI, FR 3743), Université de Toulouse, CNRS, UPS, 31062, France. <sup>3</sup>Department of Electrical Engineering, Stanford University, Stanford, CA 94305, USA. <sup>4</sup>BIOS Centre for Biological Signalling Studies, Albert Ludwigs University of Freiburg, D-79104 Freiburg im Breisgau, Germany. <sup>5</sup>Department of Developmental Biology, Department of Computer Science, Department of Pediatrics, Department of Biomedical Data Science, Stanford University, Stanford, CA 94305, USA.

\*Present address: Universitäts-Herzzentrum Freiburg, Kardiologische Biologie/AG Moser, Breisacher Straße 33, 79106 Freiburg, Germany. †Present address: Goethe-Universität – Campus Riedberg, Institute for Cell Biology and Neuroscience, Department of Developmental Biology of Vertebrates, Max-von-Laue-Straße 13, D-60438 Frankfurt am Main, Germany.

§Authors for correspondence (patrick.blader@univ-tlse3.fr; julie.batut@univ-tlse3.fr)

© R.A., 0000-0001-7362-8446; R.M., 0000-0002-6622-415X; H.G., 0000-0003-1501-4694; V.L., 0000-0002-8713-3425; G.B., 0000-0001-5179-3635; P.B., 0000-0003-3299-6108; J.B., 0000-0002-1984-2094

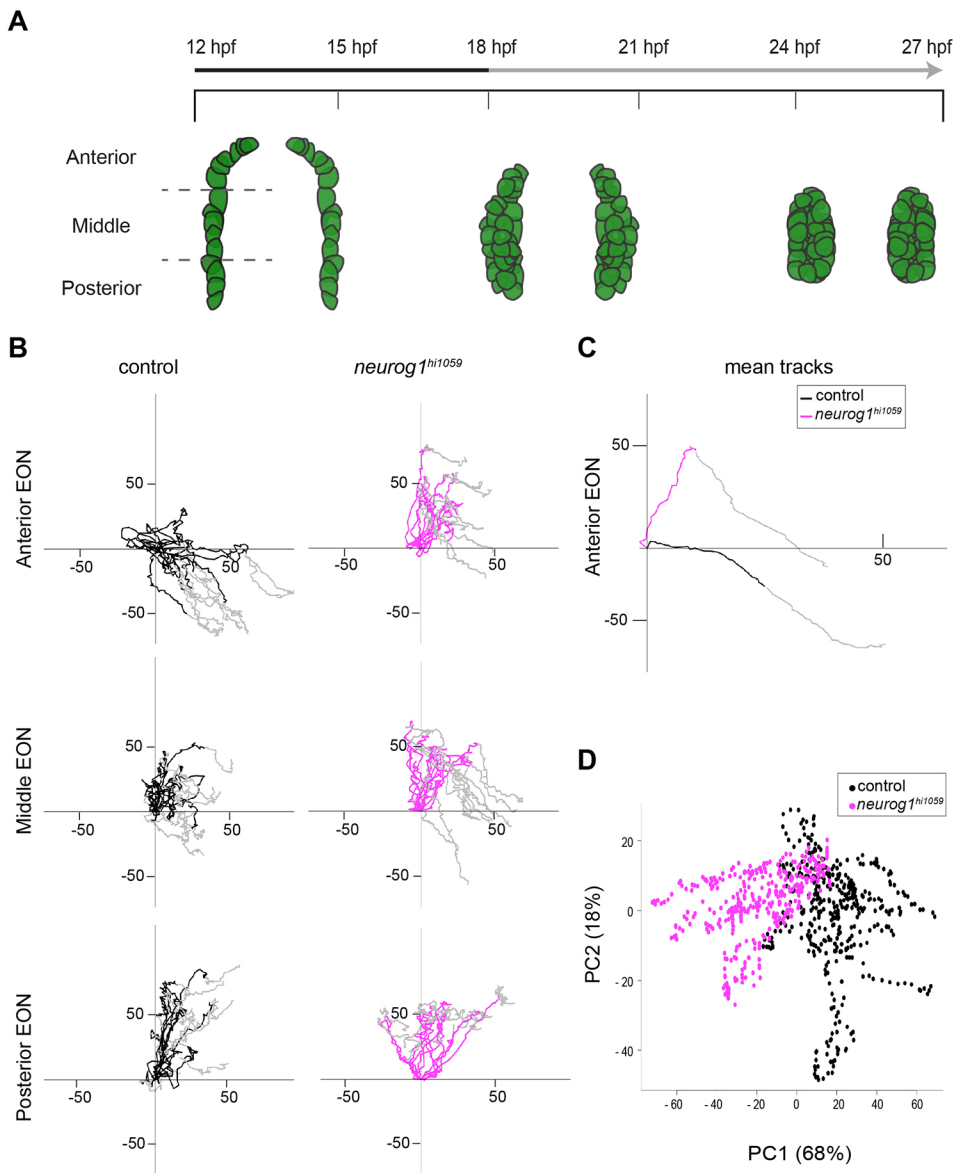

**Fig. 1. Oriented cell movements are affected in *neurog1<sup>hi1059</sup>* mutant embryos during olfactory cup formation.** (A) Graphic representation of the morphogenesis of olfactory cup from 12 hpf to 27 hpf, showing a dorsal view of the three olfactory stages: olfactory territory (12 hpf), olfactory placode (18 hpf) and olfactory cup (24 hpf). EON progenitors are represented in green as visualised with the *Tg(-8.4neurog1:gfp)* transgene. At 12 hpf, the  $-8.4neurog1:GFP+$  placodal domain can be divided into anterior, middle and posterior regions. The early (12–18 hpf; black) and late (18–27 hpf; grey) phases of morphogenesis are noted in the time line. (B) Tracks showing migration of EON of control (black) or *neurog1<sup>hi1059</sup>* mutant (magenta) embryos. Twelve tracks are represented (two cells each from the left and right of three embryos) for each of the anterior, middle and posterior domains of the developing cup indicated in A. The origin of the tracks has been arbitrarily set to the intersection of the  $x/y$ -axes and the early (coloured) and late (grey) phases of migration have been highlighted. (C) Mean tracks for anterior EON of control (black) or *neurog1<sup>hi1059</sup>* mutant (magenta) embryos. (D) Pairwise PCA scatterplots of morphogenetic parameters extracted from the datasets corresponding to the tracks in C. The major difference between control and *neurog1<sup>hi1059</sup>* mutant embryos (PC1) corresponds to the antero-posterior axis.

population, this convergence appears to happen quickly until the olfactory placode has formed (12–18 hpf), after which it slows (Fig. S1A,B; Movie 1). In *neurog1<sup>hi1059</sup>* mutants, we observed a delay in convergence, which translates into a longer AP length spread of EON than seen in control embryos (Fig. S1B). This delay is overcome, however, with the olfactory cup in *neurog1<sup>hi1059</sup>* mutant embryos ultimately attaining AP length of control embryos (Fig. S1B).

To assess the morphogenetic phenotype of *neurog1<sup>hi1059</sup>* mutant embryos at cellular resolution, we injected synthetic mRNAs encoding Histone2B-RFP (H2B-RFP) into *Tg(-8.4neurog1:gfp)* transgenic embryos, which were again imaged from 12 to 27 hpf. Morphogenetic parameters of individual EON located in the anterior, middle and posterior thirds of the initial *neurog1:GFP+* population were extracted from datasets generated by manually tracking H2B-RFP-positive nuclei (Movies 2 and 3). The position of each tracked EON was then plotted relative to its origin. As for the global analysis, the behaviour we observe for single EON in control embryos largely recapitulates those already reported (Fig. 1B; Breaux et al., 2017). Comparing the behaviour of EON in *neurog1<sup>hi1059</sup>*

mutants and siblings we found that, whereas EON in the middle and posterior regions of *neurog1<sup>hi1059</sup>* mutant embryos migrate similarly to control siblings, the migratory behaviour of anterior EON is profoundly affected from 12 to 18 hpf (Fig. 1B,C; Fig. S2A); movements of individual skin cells showed no obvious differences in control versus *neurog1<sup>hi1059</sup>* mutants, suggesting that the effect is specific to EON (Fig. S3A). Principal component analysis (PCA) of the datasets confirmed that the major difference between control and *neurog1<sup>hi1059</sup>* mutant embryos (PC1) lies in the migratory behaviour of anterior EON along the AP axis (Fig. 1D); PCA revealed a more subtle difference in migration of the middle EON population along the same axis (Fig. S2B) and between the posterior EON populations along the superficial-deep axis (Fig. S2B). These migratory defects are not due to a decrease in cell mobility, as EON in *neurog1* mutants displayed increased displacement over time compared with controls (Fig. S3B,C); little or no difference was detected in the displacement of skin cells between control and *neurog1<sup>hi1059</sup>* mutant embryos (Fig. S3B,D). Taken together, our results indicate that Neurog1 is required between 12 and 18 hpf for the migratory behaviour of olfactory progenitors.

The chemokine receptor *Cxcr4b* and its ligand *Cxcl12a* have been implicated in olfactory cup morphogenesis in the zebrafish (Miyasaka et al., 2007). To address whether the behaviour of EON in *neurog1<sup>hi1059</sup>* mutants resembles that caused when the activity of this guidance receptor/ligand pair is abrogated, we analysed the morphogenetic parameters of EON in *cxcr4b<sup>t26035</sup>* and *cxcl12a<sup>t30516</sup>* mutants (Knaut et al., 2003; Valentin et al., 2007). As previously reported, olfactory progenitors in embryos lacking *Cxcr4b* or *Cxcl12a* function display convergence defects, highlighted by an increase in the AP length relative to controls (Fig. S4A; Movies 4 and 5; Miyasaka et al., 2007). Analysis of the behaviour of individual EON in *cxcr4b<sup>t26035</sup>* and *cxcl12a<sup>t30516</sup>* mutant embryos indicates that defects in their migration are largely restricted to the anterior cohort (Fig. 2A,B; Fig. S5A,B); EON show increased displacement over time in both *cxcr4b<sup>t26035</sup>* and *cxcl12a<sup>t30516</sup>* mutants (Fig. S4B,C) and no difference is apparent in the behaviour of skin cells in either mutant relative to control siblings (Figs S4B,D and S6). A combined PCA of datasets for anterior EON of *neurog1<sup>hi1059</sup>*, *cxcr4b<sup>t26035</sup>* and *cxcl12a<sup>t30516</sup>* mutants confirms that the major difference in EON behaviour lies in their displacement along the AP axis (PC1; Fig. 2C). Finally, clustering of the PCA analysis reveals that there is more resemblance in the behaviour of anterior EON between the three mutants than between any single mutant and controls (Fig. 2D).

The similarity in the migration phenotype of EON in *neurog1<sup>hi1059</sup>*, *cxcr4b<sup>t26035</sup>* and *cxcl12a<sup>t30516</sup>* mutant embryos suggests that the proneural transcription factor and the receptor/ligand couple act in the same pathway. Furthermore, the expression patterns of *neurog1* and *cxcr4b* overlap extensively from early stages

(Fig. S7); *neurog1* and *cxcl12a* only overlap in the telencephalon at relative late stages (data not shown). To determine whether the expression of either the receptor or its ligand are affected in the absence of *Neurog1*, we assessed their expression in *neurog1<sup>hi1059</sup>* mutant embryos. We found that *cxcr4b* expression is dramatically reduced or absent in EON progenitors at 12 and 15 hpf in this context (Fig. 3A); the expression of *cxcr4b* recovers in *neurog1<sup>hi1059</sup>* mutant embryos from 18 hpf, a stage at which we have previously reported that the expression of a second bHLH proneural gene, *neurod4*, also becomes *Neurog1*-independent (Fig. 3A; Madelaine et al., 2011). Contrary to *cxcr4b*, the expression of *cxcl12a* is unaffected in *neurog1<sup>hi1059</sup>* mutant embryos at all stages analysed (Fig. 3B). Taken together, these results suggest that the EON migration phenotype in *neurog1<sup>hi1059</sup>* mutant embryos results from the lack of *Cxcr4b* during the early phase of olfactory cup morphogenesis.

If the absence of early *cxcr4b* expression in *neurog1<sup>hi1059</sup>* mutants underlies the morphogenesis defects in this background, we hypothesised that restoring its expression should rescue these defects. To test this, we generated a transgenic line in which expression of the chemokine receptor is controlled by a  $-8.4$  kb fragment of genomic DNA responsible for *neurog1* expression in EON, *Tg(-8.4neurog1:cxcr4b-mCherry)*, and introduced it into the *neurog1<sup>hi1059</sup>* mutant background (Blader et al., 2003; Madelaine et al., 2011). Analysis of the migratory behaviour of anterior EON in *neurog1<sup>hi1059</sup>* mutant embryos carrying the transgene indicates that they display oriented posterior migration similar to control embryos and siblings carrying the transgene (Fig. 3C,D; Movies 6 and 7). The similarity in the behaviour of the anterior EON is also evident after PCA analysis and clustering, where *neurog1<sup>hi1059</sup>* mutant cells

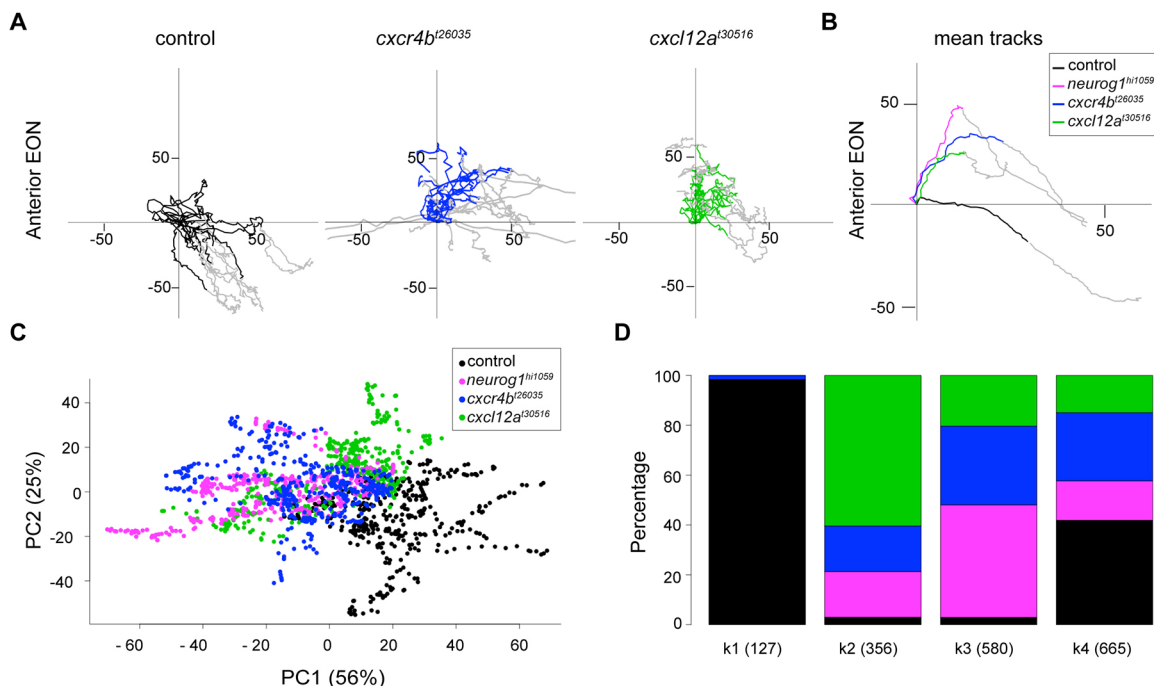

**Fig. 2. Morphogenetic defects in *cxcr4b<sup>t26035</sup>* and *cxcl12a<sup>t30516</sup>* mutant embryos resemble those of *neurog1<sup>hi1059</sup>*.** (A) Tracks showing migration of anterior EON from control (black), *cxcr4b<sup>t26035</sup>* (blue) and *cxcl12a<sup>t30516</sup>* (green) embryos. Twelve anterior tracks are represented (two cells each from the left and right of three embryos). The origin of the tracks has been arbitrarily set to the intersection of the  $x/y$ -axes and the early (coloured) and late (grey) phases of migration have been highlighted. (B) Mean tracks showing migration of anterior EON of control (black), *neurog1<sup>hi1059</sup>* (magenta), *cxcr4b<sup>t26035</sup>* (blue) and *cxcl12a<sup>t30516</sup>* (green) mutant embryos. (C) Pairwise PCA scatterplots of morphogenetic parameters extracted from the datasets corresponding to the tracks in B. The major difference between control, *neurog1<sup>hi1059</sup>*, *cxcr4b<sup>t26035</sup>* and *cxcl12a<sup>t30516</sup>* mutant embryos (PC1) corresponds to the antero-posterior axis. (D) Clustering analysis of morphogenetic parameters extracted from the datasets presented in B and analysed in C. One cluster, k1, contains almost exclusively control cells (black), whereas cells from *neurog1<sup>hi1059</sup>* (magenta), *cxcr4b<sup>t26035</sup>* (blue) and *cxcl12a<sup>t30516</sup>* (green) mutant embryos clustered together in k2, k3 and k4.

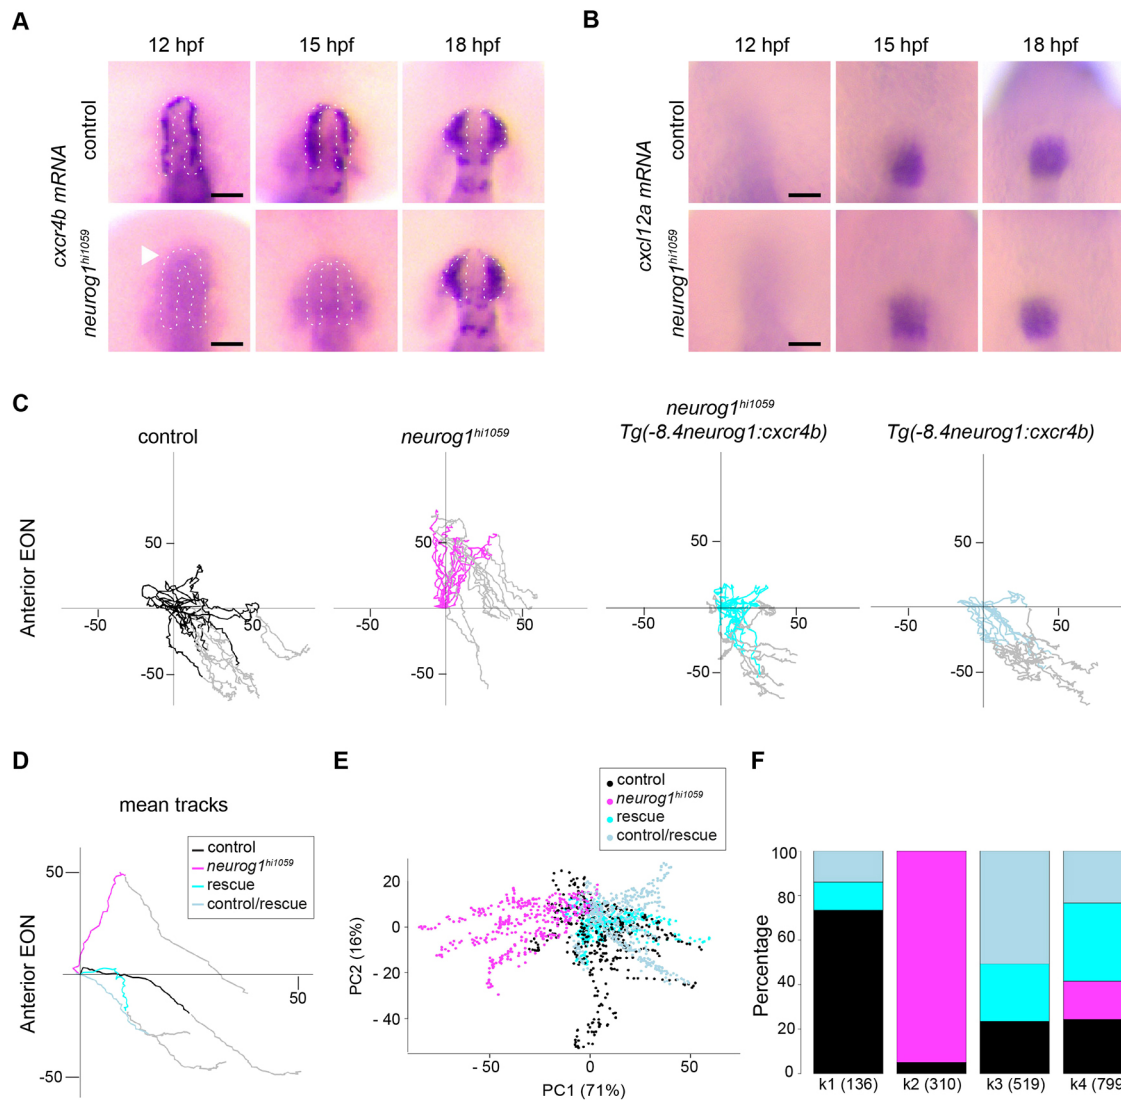

**Fig. 3. Cxcr4b is the predominant downstream effector of Neurog1 during olfactory cup morphogenesis.** (A) *cxcr4b* whole-mount *in situ* hybridisation at 12, 15 and 18 hpf in control and *neurog1<sup>hi1059</sup>* mutant embryos. *cxcr4b* expression is dramatically reduced or absent in EON progenitors at 12 and 15 hpf in *neurog1<sup>hi1059</sup>* mutant embryos (white dotted lines) but from 18 hpf the expression of *cxcr4b* recovers. (B) *cxcl12a* whole-mount *in situ* hybridisation at 12, 15 and 18 hpf in control and *neurog1<sup>hi1059</sup>* mutant embryos, in which *cxcl12a* expression is not affected. (C) Tracks showing migration of anterior EON of control (black) embryos, *neurog1<sup>hi1059</sup>* mutant embryos (magenta), *neurog1<sup>hi1059</sup>* mutant embryos carrying the *Tg(-8.4neurog1:cxcr4b)* transgene (cyan) and control embryos carrying *Tg(-8.4neurog1:cxcr4b)* (light blue). Twelve anterior tracks are represented (from four embryos). The origin of the tracks has been arbitrarily set to the intersection of the *x/y*-axes and the early (coloured) and late (grey) phases of migration have been highlighted. (D) Mean tracks showing migration of anterior EON of the tracks in C. (E) Pairwise PCA scatterplots of morphogenetic parameters extracted from the datasets presented in D. The major difference between control, *neurog1<sup>hi1059</sup>*, and control or *neurog1<sup>hi1059</sup>* with the rescue transgene (PC1) corresponds to the antero-posterior axis. (F) Clustering analysis of morphogenetic parameters extracted from the datasets presented in D and analysed in E. One cluster, k2, contains virtually exclusively *neurog1<sup>hi1059</sup>* cells (magenta), whereas cells from control (black), rescue (cyan) and control/rescue (light blue) embryos clustered together in k1, k3 and k4. Scale bars: 100  $\mu$ m.

carrying the transgene group primarily with control cells with or without the transgene rather than mutant cells lacking the transgene (Fig. 3E,F). Restoring the expression of *cxcr4b* does not rescue the reduced EON cell numbers in *neurog1<sup>hi1059</sup>* mutant embryos [*neurog1<sup>-/-</sup>*:  $20.17 \pm 2.24$  (mean  $\pm$  s.e.m.) versus *neurog1<sup>-/-</sup>;Tg*:  $13.83 \pm 0.98$ ], suggesting that the migration phenotype is caused by the lack of Cxcr4b guidance receptor and not the size of the EON population. Although we cannot exclude that there are other factors involved downstream of Neurog1, the similarity of the migration phenotype in *neurog1* and *cxcr4b* mutant embryos suggests that Cxcr4b is the predominant downstream effector of Neurog1 during the early phase of olfactory cup morphogenesis.

Finally, we asked whether *cxcr4b* is a direct transcriptional target of Neurog1 by searching for potential Neurog1-dependent cis-regulatory modules (CRM) at the *cxcr4b* locus. Proneural transcription factors bind CANNTG sequences known as E-boxes, which are often found in clusters (Bertrand et al., 2002). We identified 18 E-box clusters in the sequences from  $-100$  to  $+100$  kb of the *cxcr4b* initiation codon, but only one of these clusters contains more than one of the  $CA^A/GATG$  E-box sequence preferred by Neurog1 (Fig. 4A; data not shown; Madelaine and Blader, 2011). Coherent with a role for this E-box cluster in the regulation of *cxcr4b* expression, a transgenic line generated using a 35 kb fosmid clone that contains this cluster, *TgFOS(cxcr4b:eGFP)*, shows robust

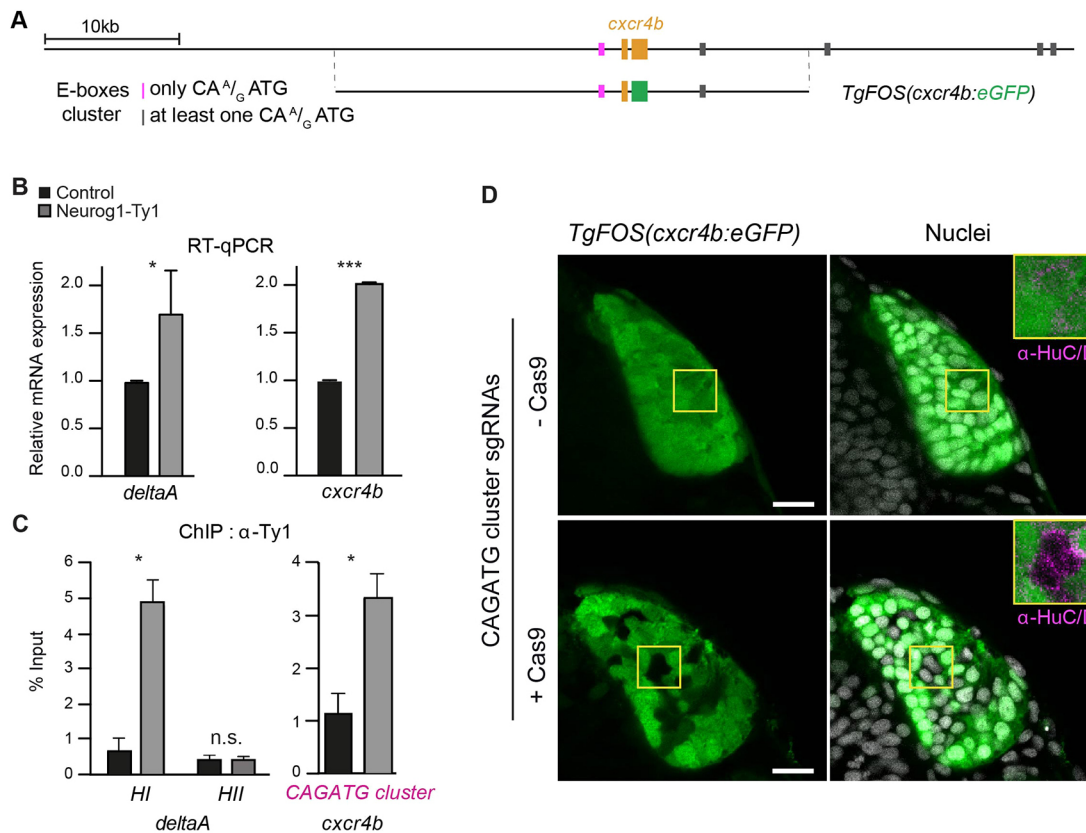

**Fig. 4. Neurog1 directly controls *cxcr4b* expression via an upstream cis-regulatory module (CRM).** (A) Schematic of the *cxcr4b* locus, indicating the position of exons of the *cxcr4b* gene (orange) and E-box clusters, which are colour-coded depending on the nature of the E-box sequences. Also presented is the position of the genomic sequences found in the *TgFOS(cxcr4b:eGFP)* transgene. (B) qPCR analysis of the effect of Neurog1-Ty1 mRNA mis-expression on the relative mRNA levels of the known Neurog1 target gene *deltaA* and *cxcr4b*. A significant increase in expression is detected for both genes. (C) ChIP using an antibody against Ty1 and chromatin prepared from 15 hpf embryos mis-expressing Neurog1-Ty1 mRNA (grey). Control (black) represents ChIP with IgG alone. (D) Single confocal sections of *TgFOS(cxcr4b:eGFP)* embryos at 24 hpf, showing eGFP expression in the olfactory cups, and either HuC/D expression or nuclear labelling (TOPRO). Embryos were injected with an sgRNA pair flanking the E-box-containing CRM at the *cxcr4b* locus plus or minus Cas9 as a control. Insets show HuC/D expression in both conditions. Data are mean  $\pm$  s.e.m. \* $P=0.01$ , \*\*\* $P=0.0001$  (two-tailed Student's *t*-test). n.s., not significant. Scale bars: 20  $\mu$ m.

expression of GFP in the olfactory cup (Fig. 4A,D). To investigate whether this cluster acts as a bona fide Neurog1-dependent CRM, we performed chromatin immunoprecipitation (ChIP) experiments. In the absence of a ChIP-compatible antibody against endogenous zebrafish Neurog1, we chose a strategy based on mis-expression of a Ty1-tagged form of Neurog1. Mis-expression of Neurog1-Ty1 efficiently induces the expression of *deltaA*, a known Neurog1 target, and *cxcr4b*, suggesting that tagging Neurog1 does not affect its transcriptional activity and that *cxcr4b* behaves as a Neurog1 target (Fig. 4B). We have previously shown that the *deltaA* locus contains two proneural regulated CRMs (Madelaine and Blader, 2011); whereas CRM HI is Neurog1-dependent, HII underlies regulation of *deltaA* by members of the Ascl1 family of bHLH proneural factors (Hans and Campos-Ortega, 2002; Madelaine and Blader, 2011). We found that ChIP against Neurog1-Ty1 after mis-expression effectively discriminates between the Neurog1-regulated HI and Ascl1-regulated HII CRM at the *deltaA* locus, thus providing a control for the specificity of our ChIP strategy (Fig. 4C). Similarly, we were able to ChIP the potential CRM containing the CAGATG E-box cluster at the *cxcr4b* locus, suggesting that this region is also a target for Neurog1 (Fig. 4C).

To address the importance of the E-box cluster in the regulation of *cxcr4b* expression, we employed a Crispr/Cas9 approach to delete this CRM using a pair of sgRNAs flanking the CRM (Fig. S8A). The sgRNA pair efficiently induces deletions in the targeted sequence, as

judged by PCR on genomic DNA extracted from injected embryos (Fig. S8B). Injection of the sgRNA pair into *TgFOS(cxcr4b:eGFP)* transgenic embryos caused mosaic disruption of the eGFP expression pattern (Fig. 4D). Loss of *TgFOS(cxcr4b:eGFP)* transgene expression is not due to cell death, as eGFP-negative cells maintain the expression of the early neuronal marker HuC/D (insets in Fig. 4D). Taken together, the results from our ChIP and Crispr/Cas9 experiments strongly suggest that the CAGATG E-box cluster upstream of *cxcr4b* is regulated directly by Neurog1.

Neurog1 controls an early wave of neurogenesis in the zebrafish olfactory epithelium (Madelaine et al., 2011). As in invertebrates, control of neurogenesis by this proneural transcription factor is achieved via the transcriptional regulation of so-called neurogenic genes, such as *deltaA* and *deltaD* in the fish (Hans and Campos-Ortega, 2002; Madelaine and Blader, 2011). Our present study highlights that Neurog1 is also required for morphogenesis of the zebrafish peripheral olfactory sensory organ, in this case via its target gene *cxcr4b*. Thus, our data support a simple mechanism whereby Neurog1 couples neurogenesis with morphogenesis via the transcriptional regulation of distinct targets. It has previously been shown that members of the Neurog family regulate *Delta1* (DII1) and *Cxcr4* expression in the mouse, and that development of the olfactory epithelium in this model requires Neurog-family proneural factors (Beckers et al., 2000; Mattar et al., 2004; Shaker et al., 2012). Although it remains to be demonstrated, we propose that this

parsimonious mechanism for coordinating the development of the olfactory system may have been conserved across vertebrates.

## MATERIALS AND METHODS

### Fish husbandry and lines

All embryos were handled according to relevant national and international guidelines. French veterinary services and the ethics committee of the Fédération de Recherche en Biologie de Toulouse (C2EA no. 01) approved the protocols used in this study, with approval ID: A-31-555-01 and APAPHIS #3653-2016011512005922v6.

Fish were maintained at the Centre de Biologie du Développement, Centre de Biologie Intégrative zebrafish facility in accordance with the rules and protocols in place. The *neurog1<sup>hi1059</sup>*, *cxcr4b<sup>26035</sup>* and *cxcl12a<sup>30516</sup>* mutant lines have previously been described (Golling et al., 2002; Knaut et al., 2003; Valentin et al., 2007), as has the *Tg(-8.4neurog1:gfp)<sup>sb1</sup>* (Blader et al., 2003). Embryos were obtained through natural crosses and staged according to Kimmel et al. (1995).

### Establishment of new transgenic lines

The *Tg(-8.4neurog1:cxcr4b-mCherry)* transgene was generated by first cloning the coding region of *cxcr4b* minus its endogenous stop codon in frame upstream of mCherry. The resulting *cxcr4b-mCherry* fusion coding sequence was transferred into the middle entry plasmid of the Tol2kit developed in the Chien lab (Kwan et al., 2007). The final transgene vector was generated using LR recombination with a previously described *p5'-8.4neurog1* (Madelaine et al., 2011), the *pME-cxcr4b-mCherry*, and the *p3E-polyA* and *pDestTol2pA/pDestTol2pA2* from the Tol2kit (Kwan et al., 2007). The line was then generated by co-injecting the transgene with mRNA encoding Tol2 transposase into freshly fertilised zebrafish embryos.

The *TgFOS(cxcr4b:eGFP)<sup>fu107g</sup>* transgenic line was generated using homologous recombination by replacing the second exon of *cxcr4b* by LynGFP in the Fosmid CH1073-406F3, followed by zebrafish transgenesis (Revenu et al., 2014). The first five amino acids encoded by the first exon of *cxcr4b* are fused to LynGFP, preventing targeting to the membrane. The GFP localises to the cytoplasm in this transgenic line.

### In situ hybridisation, immunostaining and microscopy

*In situ* hybridisation was performed as previously described (Oxtoby and Jowett, 1993). Antisense DIG-labelled probes for *cxcr4b* and *cxcl12a* (David et al., 2002) were generated using standard procedures. *In situ* hybridisations were visualised using BCIP and NBT (Roche) as substrates.

Embryos were immunostained as previously described (Madelaine et al., 2011); the primary antibody used was mouse anti-HuCD (1:500; 16A11, Molecular Probes), which was detected using Alexa Fluor 555 conjugated goat anti-mouse IgG diluted (1:1000; A-28180, Molecular Probes). Immunostained embryos were counterstained with Topro3 (T3605, Molecular Probes). Labelled embryos were imaged using an upright SP8 Leica confocal microscope and analysed using ImageJ and Imaris 8.3 (Bitplane) software.

### Cell tracking in time-lapse confocal datasets

Embryos carrying the *Tg(-8.4neurog1:gfp)* transgene (Blader et al., 2003) were injected with synthetic mRNA encoding an H2B-RFP fusion protein; for analysis of the global behaviour of olfactory morphogenesis, un-injected embryos were used. Embryos were then grown to 12 hpf, at which point they were dechorionated and embedded for imaging in 0.7% low-melting point agarose in fish system water. A time-lapse series of confocal stacks (1  $\mu$ m slice/180  $\mu$ m deep) was generated of the anterior neural plate and flanking non-neural ectoderm on an upright Leica SP8 confocal microscope using a 25 $\times$  HC Fluotar water-immersion objective. Confocal stacks were taken every 7 min until 27 hpf, when the olfactory rosette was clearly visible. The trajectory of anterior, middle and posterior EON cohorts was subsequently constructed using Imaris 8.3 analysis software (Bitplane). Briefly, H2B-RFP+; *neurog1:GFP*+EON were followed manually in the *x*-, *y*- and *z*-axes, and the centre of the nucleus of the cell of interest was determined and 'tagged' in each frame. Tags were subsequently linked in Imaris to create the trajectories shown in Movies 1-7. The position of each tag was also extracted and used as the raw data for the track analysis described below. Unless

mentioned, for each of three embryos, two anterior, middle and posterior cells from the left and right olfactory organs were tracked.

### Track analysis

Track parameters were extracted from Imaris as CSV files and analysed using a custom script generated in R (The R Project for Statistical Computing, www.r-project.org). First, tracks were rendered symmetric across the left-right axis for ease of interpretation. Tracks were then colour coded according to their genotype and to the phase of migration (early, from 12-18 hpf; late, from 18-27 hpf) and plotted. Finally, the mean for each set of tracks was generated using the 'RowMeans' function and plots were generated. The R scripts and raw data files have been deposited on GitHub ([https://github.com/BladerLab/Aguillon\\_2020](https://github.com/BladerLab/Aguillon_2020)).

PCA and clustering were performed using the built-in R function 'prcomp' from the 'FactoMineR' package and the 'kmeans' function from the 'stats' package, respectively. In the figures, PCA analysis is presented as a scatterplot of the data for the two parameters (PC1 and PC2) that vary the most amongst the parameters analysed. The variances listed for the principal components highlight the fraction of the specific variance relative to the sum of all variances (100%). For example, in Fig. 1D the first principal component (PC1) is the variance between the behaviour of control and *neurog1<sup>-/-</sup>* EON cells along the antero-posterior (*x*) axis, and it accounts for 68% of the total variance between all the parameters analysed. Finally, the 'barplot' function ('graphics' package) was used to represent either the EON or skin displacement behaviours.

### ChIP and qPCR

ChIP experiments were performed as previously described using approximately 300 embryos (12-15 hpf) per immunoprecipitation (Wardle et al., 2006). Two to four separate ChIP experiments were carried out with corresponding independent batches of either control uninjected embryos or embryos injected with a synthetic mRNA encoding Neurog1-Ty1; ChIP-grade mouse anti-Ty1 (1:100; BB2, Sigma-Aldrich) was used. Primers used for qPCR on ChIPs were: *cxcr4b* CATATG cluster, fw 5'-CTACATCTAAAAATTGAAAGA-3' and rev 5'-CAAACCCAACACCCCTACTG-3'; *deltaA* HI fw 5'-GCGGAATGAACCACCAACTT-3' and rev 5'-GTGTGACTAAAGGTGTATGGGTG-3'; *deltaA* HII fw 5'-TATTGTG-TGCAGGCGGAATA-3' and rev 5'-GTTTGAATGGGCTCTGAGA-3'.

Reactions were carried out in triplicates on a MyIQ device (Bio-Rad). The specific signals were calculated as the ratio between the signals with the Ty1 antibody and beads alone, and were expressed as percentage of chromatin input.

For qPCR experiments, to determine expression levels of *cxcr4b* and *deltaA* after mis-expression of Neurog1-Ty1, total RNAs were extracted from 20 injected embryos at 15 hpf using the RNeasy Mini Kit (Qiagen), and reverse-transcribed using the PrimeScript RT reagent kit (Ozyme) according to the supplier's instructions. q-PCR analyses were performed on a MyIQ device (Bio-Rad) with the SsoFast EvaGreen Supermix (Bio-Rad), according to the manufacturer's instructions. All experiments include a standard curve. Samples from embryos were normalised to the number of *efla* (*efl1all1*) mRNA copies. Primers for qPCR to determine the expression levels of *cxcr4b* and *deltaA* after mis-expression of Neurog1-Ty1 normalised to the expression of *efla* were: *cxcr4b* coding fw 5'-GCTGGCATATTTCCACTGCT-3' and rev 5'-AGTGCCTGGACGACTCTGA-3'; *deltaA* coding fw 5'-CGGGT-TTACAGGCATGAACT-3' and rev 5'-ATTGTTCTTTCGTGGCAAG-3'; *efla* fw 5'-GCATACATCAAGAAGATCGGC-3' and rev 5'-GCAGCCTT-CTGTGCAGACTTTG-3'.

### Crispr/Cas9 deletion of potential CRM at the *cxcr4b* locus

sgRNA sequences flanking the CAGATG E-box cluster at the *cxcr4b* locus were designed using the web-based CRISPRscan algorithm (Moreno-Mateos et al., 2015; <http://www.crisprscan.org>). The targeted sequences are 5'-GGCTTATGATGGAGGCGACTGG-3' and 5'-GGCTTGTATTGCC-CTTGAGGG-3'; the PAM sequences at the target site are underlined. Templates for the transcription of sgRNAs were generated by PCR following previously described protocols (Nakayama et al., 2014). Injection of sgRNAs was performed as described by Burger et al. (2016), using a commercially available Cas9 protein (New England Biolabs). The

efficiency of creating deletion after co-injection of the sgRNA pair was determined by PCR on genomic DNA extracted from injected embryos using the following primers: 5'-AACTCGCATTTCGGCAAACCTC-3' and 5'-AAGGGGATAATGAGCAGTCAGC-3'. Although a 500 base-pair PCR fragment is generated from a wild-type locus, an ~200 base-pair fragment is amplified if a deletion has been induced.

#### Acknowledgements

We thank Kristen Kwan and Chi-Bin Chien for providing plasmids of the Tol2kit, Stéphanie Bosch, Brice Ronsin and the Toulouse LITC RIO Imaging platform, and Aurore Laire and Richard Brimicombe for taking care of the fish. We also thank Marie Breau, Magali Suzanne, Christian Mosimann and members of the Blader lab for advice on experiments and comments on the manuscript.

#### Competing interests

The authors declare no competing or financial interests.

#### Author contributions

Conceptualization: R.A., R.M., H.G., V.L., G.B., P.B., J.B.; Software: M.A., J.B.; Validation: J.B.; Formal analysis: R.A., R.M., H.G., S.L., P.D., V.L., G.B., J.B.; Investigation: R.A., R.M., H.G., S.L., P.D., V.L., G.B., J.B.; Data curation: R.A., M.A., P.B., J.B.; Writing - original draft: R.A., P.B., J.B.; Supervision: P.D., V.L., G.B., P.B., J.B.; Project administration: P.B., J.B.; Funding acquisition: P.B.

#### Funding

This work was supported by the Centre National de la Recherche Scientifique (CNRS); the Institut National de la Santé et de la Recherche Médicale (INSERM); Université de Toulouse III (UPS); Fondation pour la Recherche Médicale (FRM; DEQ20131029166); Fédération pour la Recherche sur le Cerveau (FRC); and the Ministère de l'Enseignement Supérieur et de la Recherche.

#### Data availability

R scripts and raw data files from track analysis are available at GitHub ([https://github.com/BladerLab/Aguillon\\_2020](https://github.com/BladerLab/Aguillon_2020)).

#### Supplementary information

Supplementary information available online at <https://dev.biologists.org/lookup/doi/10.1242/dev.192971.supplemental>

#### Peer review history

The peer review history is available online at <https://dev.biologists.org/lookup/doi/10.1242/dev.192971.reviewer-comments.pdf>

#### References

- Beckers, J., Caron, A., Hrabé de Angelis, M., Hans, S., Campos-Ortega, J. A. and Gossler, A. (2000). Distinct regulatory elements direct delta1 expression in the nervous system and paraxial mesoderm of transgenic mice. *Mech. Dev.* **95**, 23-34. doi:10.1016/S0925-4773(00)00322-1
- Bertrand, N., Castro, D. S. and Guillemot, F. (2002). Proneural genes and the specification of neural cell types. *Nat. Rev. Neurosci.* **3**, 517-530. doi:10.1038/nrn874
- Blader, P., Plessy, C. and Strähle, U. (2003). Multiple regulatory elements with spatially and temporally distinct activities control neurogenin1 expression in primary neurons of the zebrafish embryo. *Mech. Dev.* **120**, 211-218. doi:10.1016/S0925-4773(02)00413-6
- Breau, M. A., Bonnet, I., Stoufflet, J., Xie, J., De Castro, S. and Schneider-Maunoury, S. (2017). Extrinsic mechanical forces mediate retrograde axon extension in a developing neuronal circuit. *Nat. Commun.* **8**, 282. doi:10.1038/s41467-017-00283-3
- Burger, A., Lindsay, H., Felker, A., Hess, C., Anders, C., Chiavacci, E., Zaugg, J., Weber, L. M., Catena, R., Jinek, M., Robinson, M. D. and Mosimann, C. (2016). Maximizing mutagenesis with solubilized CRISPR-Cas9 ribonucleoprotein complexes. *Development* **143**, 2025-2037. doi:10.1242/dev.134809
- David, N. B., Sapede, D., Saint-Etienne, L., Thisse, C., Thisse, B., Dambly-Chaudière, C., Rosa, F. M. and Ghysen, A. (2002). Molecular basis of cell migration in the fish lateral line: role of the chemokine receptor CXCR4 and of its ligand, SDF1. *Proc. Natl. Acad. Sci. USA* **99**, 16297-16302. doi:10.1073/pnas.252339399
- Golling, G., Amsterdam, A., Sun, Z., Antonelli, M., Maldonado, E., Chen, W., Burgess, S., Haldi, M., Artzt, K., Farrington, S. et al. (2002). Insertional mutagenesis in zebrafish rapidly identifies genes essential for early vertebrate development. *Nat. Genet.* **31**, 135-140. doi:10.1038/ng896
- Hans, S. and Campos-Ortega, J. A. (2002). On the organisation of the regulatory region of the zebrafish deltaD gene. *Development* **129**, 4773-4784.
- Kimmel, C. B., Ballard, W. W., Kimmel, S. R., Ullmann, B. and Schilling, T. F. (1995). Stages of embryonic development of the zebrafish. *Dev. Dyn.* **203**, 253-310. doi:10.1002/aja.1002030302
- Knaut, H., Werz, C., Geisler, R., Nüsslein-Volhard, C. and Tubingen Screen, C. (2003). A zebrafish homologue of the chemokine receptor Cxcr4 is a germ-cell guidance receptor. *Nature* **421**, 279-282. doi:10.1038/nature01338
- Kwan, K. M., Fujimoto, E., Grabher, C., Mangum, B. D., Hardy, M. E., Campbell, D. S., Parant, J. M., Yost, H. J., Kanki, J. P. and Chien, C.-B. (2007). The Tol2kit: a multisite gateway-based construction kit for Tol2 transposon transgenesis constructs. *Dev. Dyn.* **236**, 3088-3099. doi:10.1002/dvdy.21343
- Madelaine, R. and Blader, P. (2011). A cluster of non-redundant Ngn1 binding sites is required for regulation of deltaA expression in zebrafish. *Dev. Biol.* **350**, 198-207. doi:10.1016/j.ydbio.2010.10.025
- Madelaine, R., Garric, L. and Blader, P. (2011). Partially redundant proneural function reveals the importance of timing during zebrafish olfactory neurogenesis. *Development* **138**, 4753-4762. doi:10.1242/dev.066563
- Mattar, P., Britz, O., Johannes, C., Nieto, M., Ma, L., Rebeyka, A., Klenin, N., Polleux, F., Guillemot, F. and Schuurmans, C. (2004). A screen for downstream effectors of Neurogenin2 in the embryonic neocortex. *Dev. Biol.* **273**, 373-389. doi:10.1016/j.ydbio.2004.06.013
- Miyasaka, N., Knaut, H. and Yoshihara, Y. (2007). Cxcl12/Cxcr4 chemokine signaling is required for placode assembly and sensory axon pathfinding in the zebrafish olfactory system. *Development* **134**, 2459-2468. doi:10.1242/dev.001958
- Miyasaka, N., Wanner, A. A., Li, J., Mack-Bucher, J., Genoud, C., Yoshihara, Y. and Friedrich, R. W. (2013). Functional development of the olfactory system in zebrafish. *Mech. Dev.* **130**, 336-346. doi:10.1016/j.mod.2012.09.001
- Moreno-Mateos, M. A., Vejnar, C. E., Beaudoin, J.-D., Fernandez, J. P., Mis, E. K., Khokha, M. K. and Giraldez, A. J. (2015). CRISPRscan: designing highly efficient sgRNAs for CRISPR-Cas9 targeting in vivo. *Nat. Methods* **12**, 982-988. doi:10.1038/nmeth.3543
- Nakayama, T., Blitz, I. L., Fish, M. B., Odeleye, A. O., Manohar, S., Cho, K. W. Y. and Grainger, R. M. (2014). Cas9-based genome editing in *Xenopus tropicalis*. *Methods Enzymol.* **546**, 355-375. doi:10.1016/B978-0-12-801185-0.00017-9
- Oxtoby, E. and Jowett, T. (1993). Cloning of the zebrafish krox-20 gene (krx-20) and its expression during hindbrain development. *Nucleic Acids Res.* **21**, 1087-1095. doi:10.1093/nar/21.5.1087
- Revenu, C., Streichan, S., Dona, E., Lecaudey, V., Hufnagel, L. and Gilmour, D. (2014). Quantitative cell polarity imaging defines leader-to-follower transitions during collective migration and the key role of microtubule-dependent adherens junction formation. *Development* **141**, 1282-1291. doi:10.1242/dev.101675
- Shaker, T., Dennis, D., Kurrasch, D. M. and Schuurmans, C. (2012). Neurog1 and Neurog2 coordinately regulate development of the olfactory system. *Neural Dev.* **7**, 28. doi:10.1186/1749-8104-7-28
- Valentin, G., Haas, P. and Gilmour, D. (2007). The chemokine SDF1a coordinates tissue migration through the spatially restricted activation of Cxcr7 and Cxcr4b. *Curr. Biol.* **17**, 1026-1031. doi:10.1016/j.cub.2007.05.020
- Wardle, F. C., Odom, D. T., Bell, G. W., Yuan, B., Danford, T. W., Wiellette, E. L., Herbolsheimer, E., Sive, H. L., Young, R. A. and Smith, J. C. (2006). Zebrafish promoter microarrays identify actively transcribed embryonic genes. *Genome Biol.* **7**, R71. doi:10.1186/gb-2006-7-8-r71
- Whitlock, K. E. and Westerfield, M. (1998). A transient population of neurons pioneers the olfactory pathway in the zebrafish. *J. Neurosci.* **18**, 8919-8927. doi:10.1523/JNEUROSCI.18-21-08919.1998
- Whitlock, K. E. and Westerfield, M. (2000). The olfactory placodes of the zebrafish form by convergence of cellular fields at the edge of the neural plate. *Development* **127**, 3645-3653.
